# Supplementary material for: Risankizumab for the Treatment of Moderate to Severe Plaque Psoriasis in the Russian Federation
Source: Springer Nature journal article supplement (doi:10.1007/s13555-022-00776-0), 2022-08-02
Supplement: MOESM1 [file 23328850]

## SUPPLEMENTARY MATERIAL

### *Risankizumab for the Treatment of Moderate to Severe Plaque Psoriasis in the Russian Federation*

Liudmila Odnopozova MD, MA <sup>a</sup>, Anton Edin, MD<sup>b</sup>, Alexey Sukharev, MD<sup>c</sup>, Tianshuang Wu, PhD<sup>d</sup>, Kerstin Aydin<sup>e</sup>, Maureen Kelly, MD<sup>d\*</sup>, Alkes Khotko, MD<sup>f</sup>

<sup>a</sup>Alliance Biomedical Ural Group, Izhevsk, Russia

<sup>b</sup>LLC ArsVitae Severo-Zapad, St. Petersburg, Russia

<sup>c</sup>Clinic of Dermatology and Venerology, St. Petersburg, Russia

<sup>d</sup>AbbVie Inc., North Chicago, IL, USA

<sup>e</sup>AbbVie Deutschland GmbH & Co KG, Ludwigshafen, Germany

<sup>f</sup>GBUZ Clinical Dermatovenerology, Dispensary of MoH of Krasnodar Region, Krasnodar, Russia

\*At the time of this research.

#### **Corresponding author:**

Liudmila Odnopozova, MD, MA

Alliance Biomedical Ural Group

89 ul. 10 Let Oktyabrya st,

Izhevsk, Udmurtskaya Respublika 426061, Russian Federation

Tel: +7(3412)271789; +79127528291

E-mail: [lodnopozova@abug.su](mailto:lodnopozova@abug.su)

## Supplementary Materials

**Table S1. List of Independent Ethics Committees per Location**

| <b>Location</b>                                                                                                                                           | <b>IEC/IRB</b>                                                                                                                                                                                                                                                                                                                                            |
|-----------------------------------------------------------------------------------------------------------------------------------------------------------|-----------------------------------------------------------------------------------------------------------------------------------------------------------------------------------------------------------------------------------------------------------------------------------------------------------------------------------------------------------|
| <p>LLC ArsVitae Severo-Zapad<br/>44 Prospect Toreza, bld. 30 N, lit. A, cor. 2<br/>ST. PETERSBURG, 194223<br/>Russian Federation</p>                      | <p><b>Local:</b><br/>LEC of LLC Farmnadzor<br/>Komendantsky pr. 4, lit. A, office 618<br/>ST PETERSBURG, 197227<br/>Russian Federation<br/><b>Central:</b><br/>Ethics Counsel at the Ministry of Health of<br/>the Russian Federation<br/>3, Rakhmanovskiy pereulok<br/>MOSCOW, 127994<br/>Russian Federation</p>                                         |
| <p>LLC Kurator<br/>125 Krasnoputilovskaya str.<br/>ST. PETERSBURG,<br/>St. Petersburg, 196240<br/>Russian Federation</p>                                  | <p><b>Local:</b><br/>LEC of LLC Farmnadzor<br/>Komendantsky pr. 4, lit. A, office 618<br/>ST PETERSBURG, 197227<br/>Russian Federation<br/><b>Central:</b><br/>Ethics Counsel at the Ministry of Health of<br/>the Russian Federation<br/>3, Rakhmanovskiy pereulok<br/>MOSCOW, 127994<br/>Russian Federation</p>                                         |
| <p>GBUZ Clinical Dermato-Venereal<br/>Dispensary of MoH of Krasnodar region<br/>179, Rashpilevskaya str.<br/>KRASNODAR, 350020<br/>Russian Federation</p> | <p><b>Local:</b><br/>LEC of GBUZ Clinical Dermato-Venereal<br/>Dispensary of MoH of Krasnodar region<br/>179, Rashpilevskaya str.<br/>KRASNODAR, 350020<br/>Russian Federation<br/><b>Central:</b><br/>Ethics Counsel at the Ministry of Health of<br/>the Russian Federation<br/>3, Rakhmanovskiy pereulok<br/>MOSCOW, 127994<br/>Russian Federation</p> |
| <p>Family Outpatient clinic#4 LLC<br/>33, Stantsionnaya str., Moscow Region<br/>KOROLEV, 109044<br/>Russian Federation</p>                                | <p><b>Local:</b><br/>Local Ethics Committee at the<br/>Family Outpatient Clinic #4, LLC<br/>33, Stantsionnaya str, Moscow<br/>Region</p>                                                                                                                                                                                                                  |

|                                                                                                                                                              |                                                                                                                                                                                                                                                                                                                                                           |
|--------------------------------------------------------------------------------------------------------------------------------------------------------------|-----------------------------------------------------------------------------------------------------------------------------------------------------------------------------------------------------------------------------------------------------------------------------------------------------------------------------------------------------------|
|                                                                                                                                                              | <p>KOROLEV, 141060<br/> Russian Federation<br/> <b>Central:</b><br/> Ethics Counsel at the Ministry of Health of<br/> the Russian Federation<br/> 3, Rakhmanovskiy pereulok<br/> MOSCOW, 127994<br/> Russian Federation</p>                                                                                                                               |
| <p>LLC Alliance Biomedical Ural Group<br/> 89 ul. 10 let Ootyabrya, app. 01-04<br/> IZHEVSK, Udmurtskaya Respublika,<br/> 426061<br/> Russian Federation</p> | <p><b>Local:</b><br/> Ethics Council at Alliance<br/> Biomedical Ural Group<br/> Repina str. 35<br/> IZHEVSK, Udmurtskaya<br/> Respublika 426035<br/> Russian Federation<br/> <b>Central:</b><br/> Ethics Counsel at the Ministry of Health of<br/> the Russian Federation<br/> 3, Rakhmanovskiy pereulok<br/> MOSCOW, 127994<br/> Russian Federation</p> |
| <p>SBHI KVD #10 Clinic of Dermatology<br/> and Venerology<br/> 29A Parkhomenko pr-kt<br/> ST. PETERSBURG, 194021<br/> Russian Federation</p>                 | <p><b>Local:</b><br/> LEC of LLC Farmnadzor<br/> Komendantsky pr. 4, A, office 618<br/> ST. PETERSBURG, 197227<br/> Russian Federation<br/> <b>Central:</b><br/> Ethics Counsel at the Ministry of Health of<br/> the Russian Federation<br/> Rakhmanovskiy pereulok 3<br/> MOSCOW, 127994<br/> Russian Federation</p>                                    |
